# Supplementary material
Source: Springer Nature journal article supplement (https://www.springermedizin.de/resource/supplementary/12985_2010_1047_MOESM5_ESM.pdf/9609024)

A

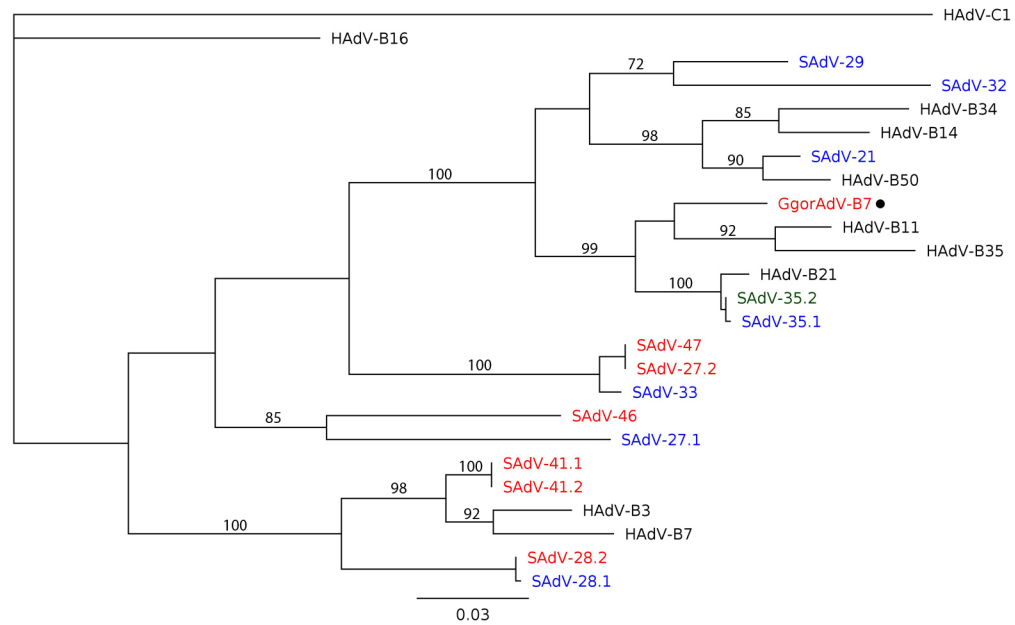

B

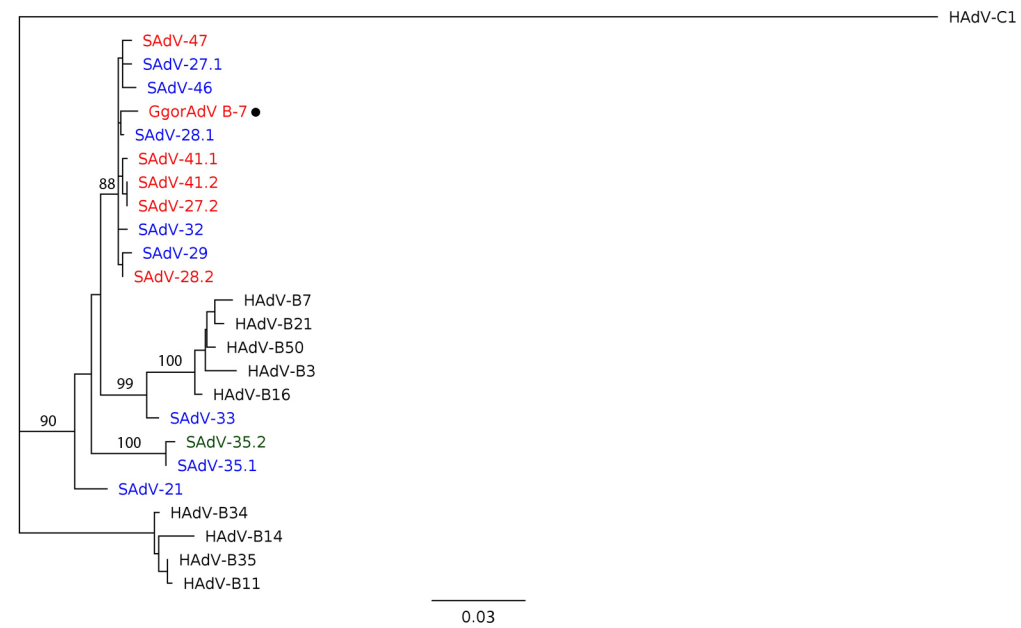

C

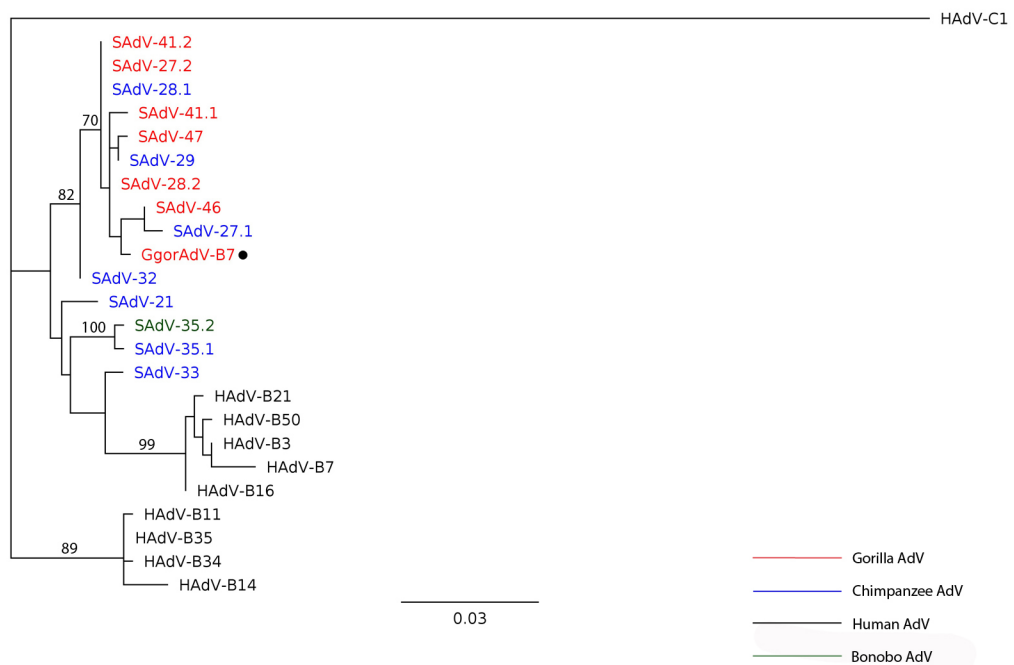

D

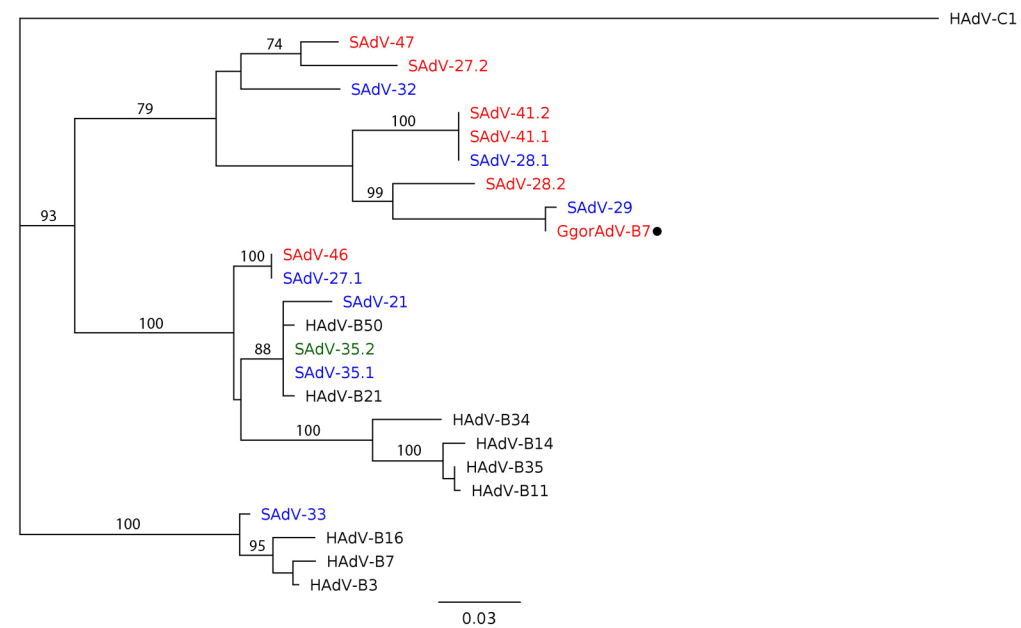

Supplement: MOESM5 [file 9609024]
